# Supplementary material for: Genome adaptation to chemical stress: clues from comparative transcriptomics in Saccharomyces cerevisiae and Candida glabrata
Source: PubMed Central journal article supplement (PMC2614496; doi:10.1186/gb-2008-9-11-r164), 2008-11-24
Supplement: gb-2008-9-11-r164-S8.pdf [file gb-2008-9-11-r164-S8.pdf]

## Additional data file 8: Overview of the methods used in this study.

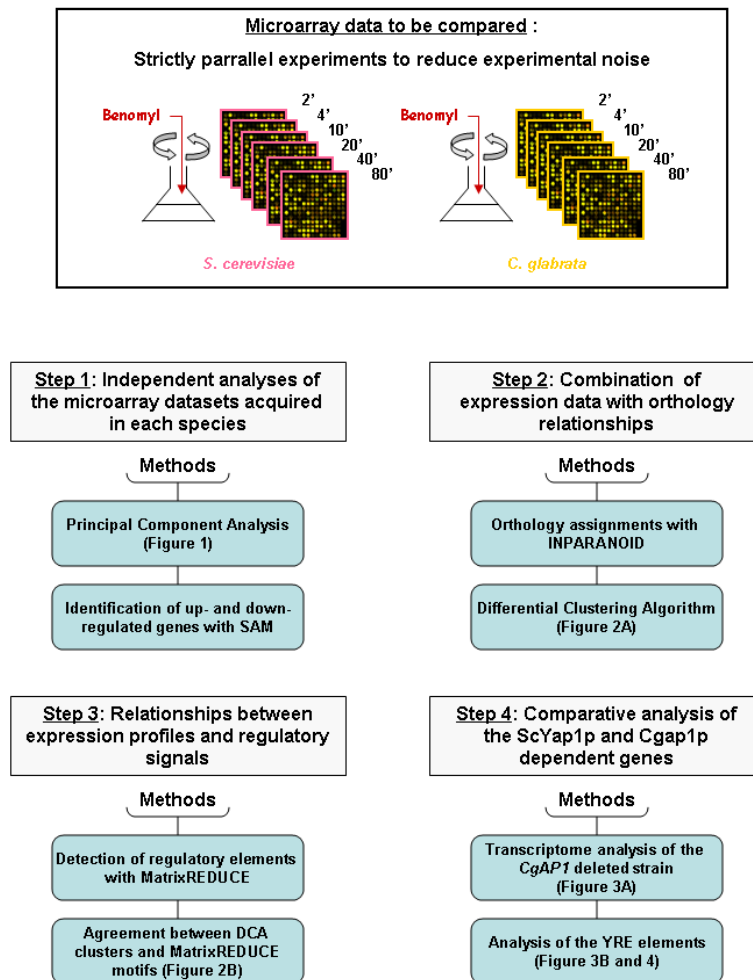

**Figure legend S8:** We proposed a general protocol for studies of the evolution of genetic networks involved in similar biological processes. We optimized conditions for the integration of expression data into a cross-species comparison by (i) choosing species from the same phylum and with a high rate of orthologous genes; (ii) producing experimental data as comparable as possible between species; (iii) sequentially applying a set of complementary bioinformatic approaches to assess the validity of the results.
