# Supplementary material for: Genome adaptation to chemical stress: clues from comparative transcriptomics in Saccharomyces cerevisiae and Candida glabrata
Source: PubMed Central journal article supplement (PMC2614496; doi:10.1186/gb-2008-9-11-r164), 2008-11-24
Supplement: gb-2008-9-11-r164-S12.pdf [file gb-2008-9-11-r164-S12.pdf]

**Additional data file 12: Mutagenesis of the YRE and CgYRE motifs.**

Mutations of YRE and CgYRE motifs in promoter of *ScFLR1* and *CgFLR1* genes were obtained using the procedure described in Methods (see the main text). Sequences of motifs before and after the mutagenesis procedure are shown below (Figure S12).

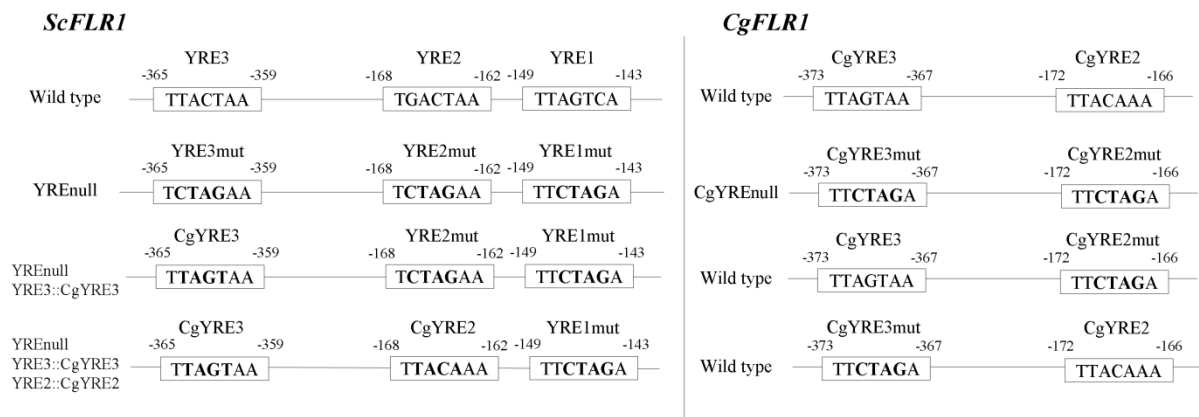

**Figure legend S12: Mutagenesis of the YRE and CgYRE motifs.**
